# Supplementary material for: Genomic Description of ‘Candidatus Abyssubacteria,’ a Novel Subsurface Lineage Within the Candidate Phylum Hydrogenedentes
Source: PubMed Central journal article supplement (PMC6121073; doi:10.3389/fmicb.2018.01993), 2018-08-28
Supplement: Image_1.pdf [file Image_1.pdf]

# Supplementary Figure 1

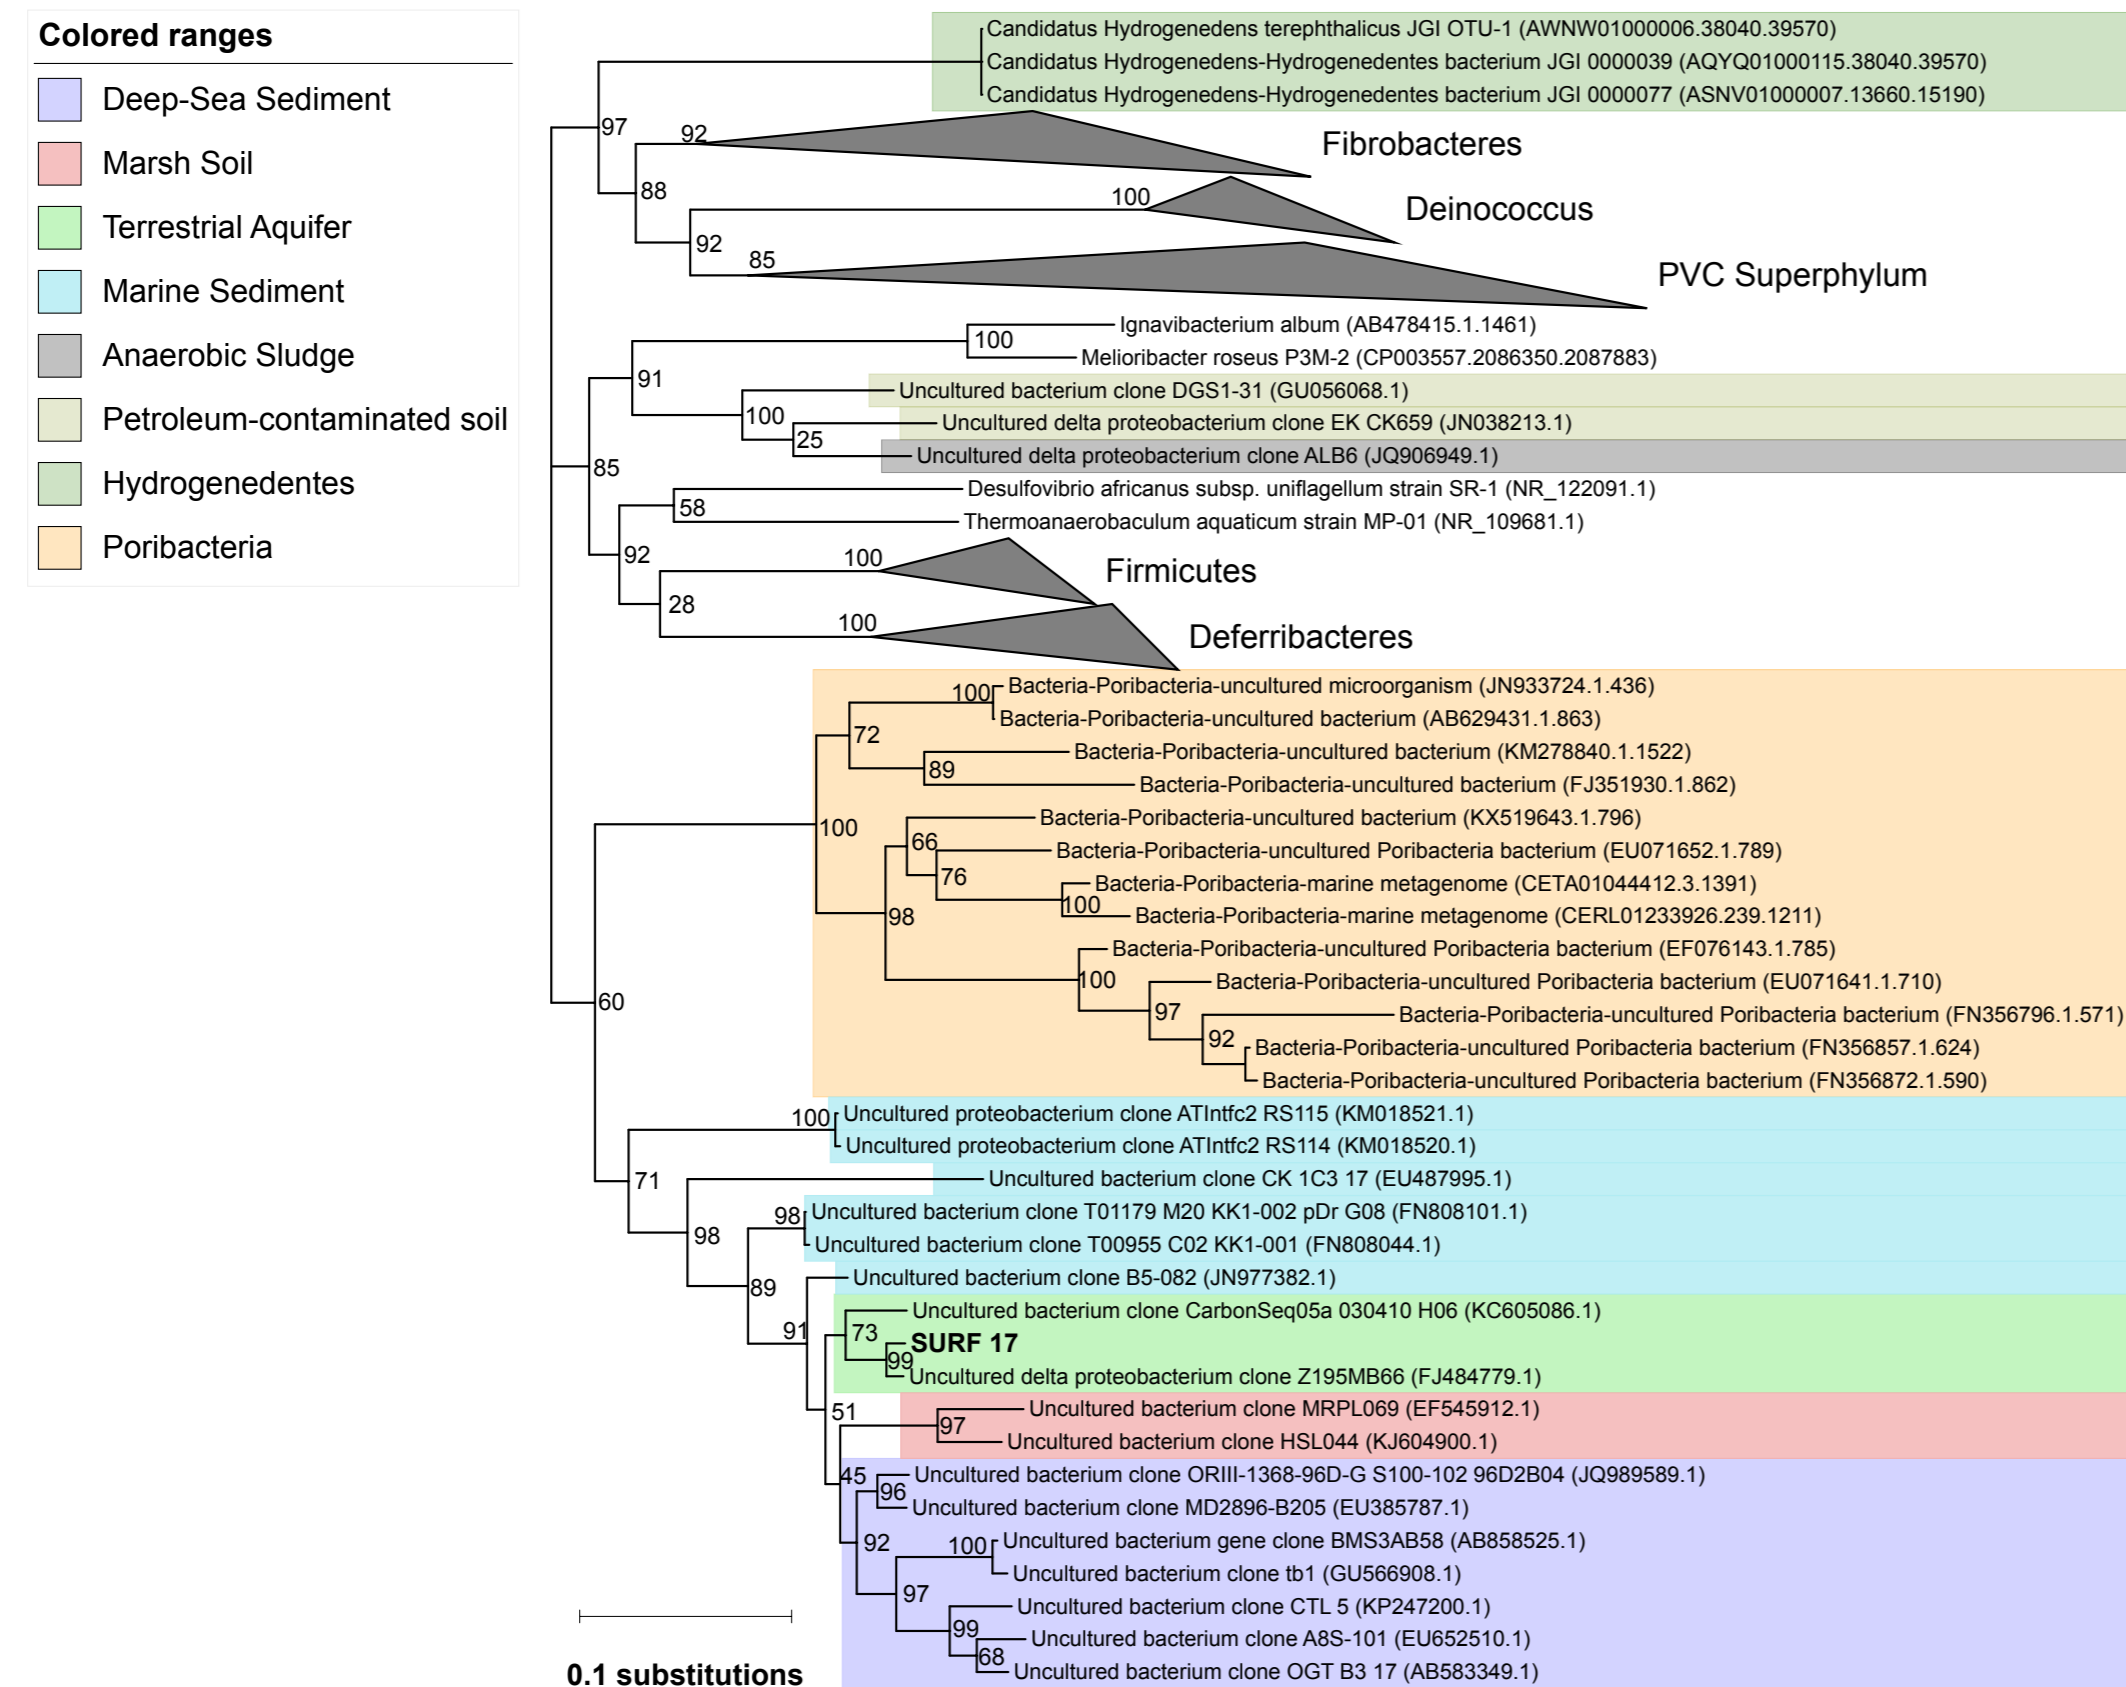

**Supplementary Figure 1.** 16S rRNA ribosomal protein tree comparing SURF\_17 sequence to 16S clone sequences available on the NCBI nr and ref\_seq databases. SURF\_17 is grouping with uncultured clones from terrestrial aquifers and marine deep sea sediments, separately from the previously named Ca. Hydrogenedentes that were collected from anaerobic bioreactors.
