# Supplementary material for: Genomic Description of ‘Candidatus Abyssubacteria,’ a Novel Subsurface Lineage Within the Candidate Phylum Hydrogenedentes
Source: PubMed Central journal article supplement (PMC6121073; doi:10.3389/fmicb.2018.01993), 2018-08-28
Supplement: Image_2.pdf [file Image_2.pdf]

# Supplementary Figure 2

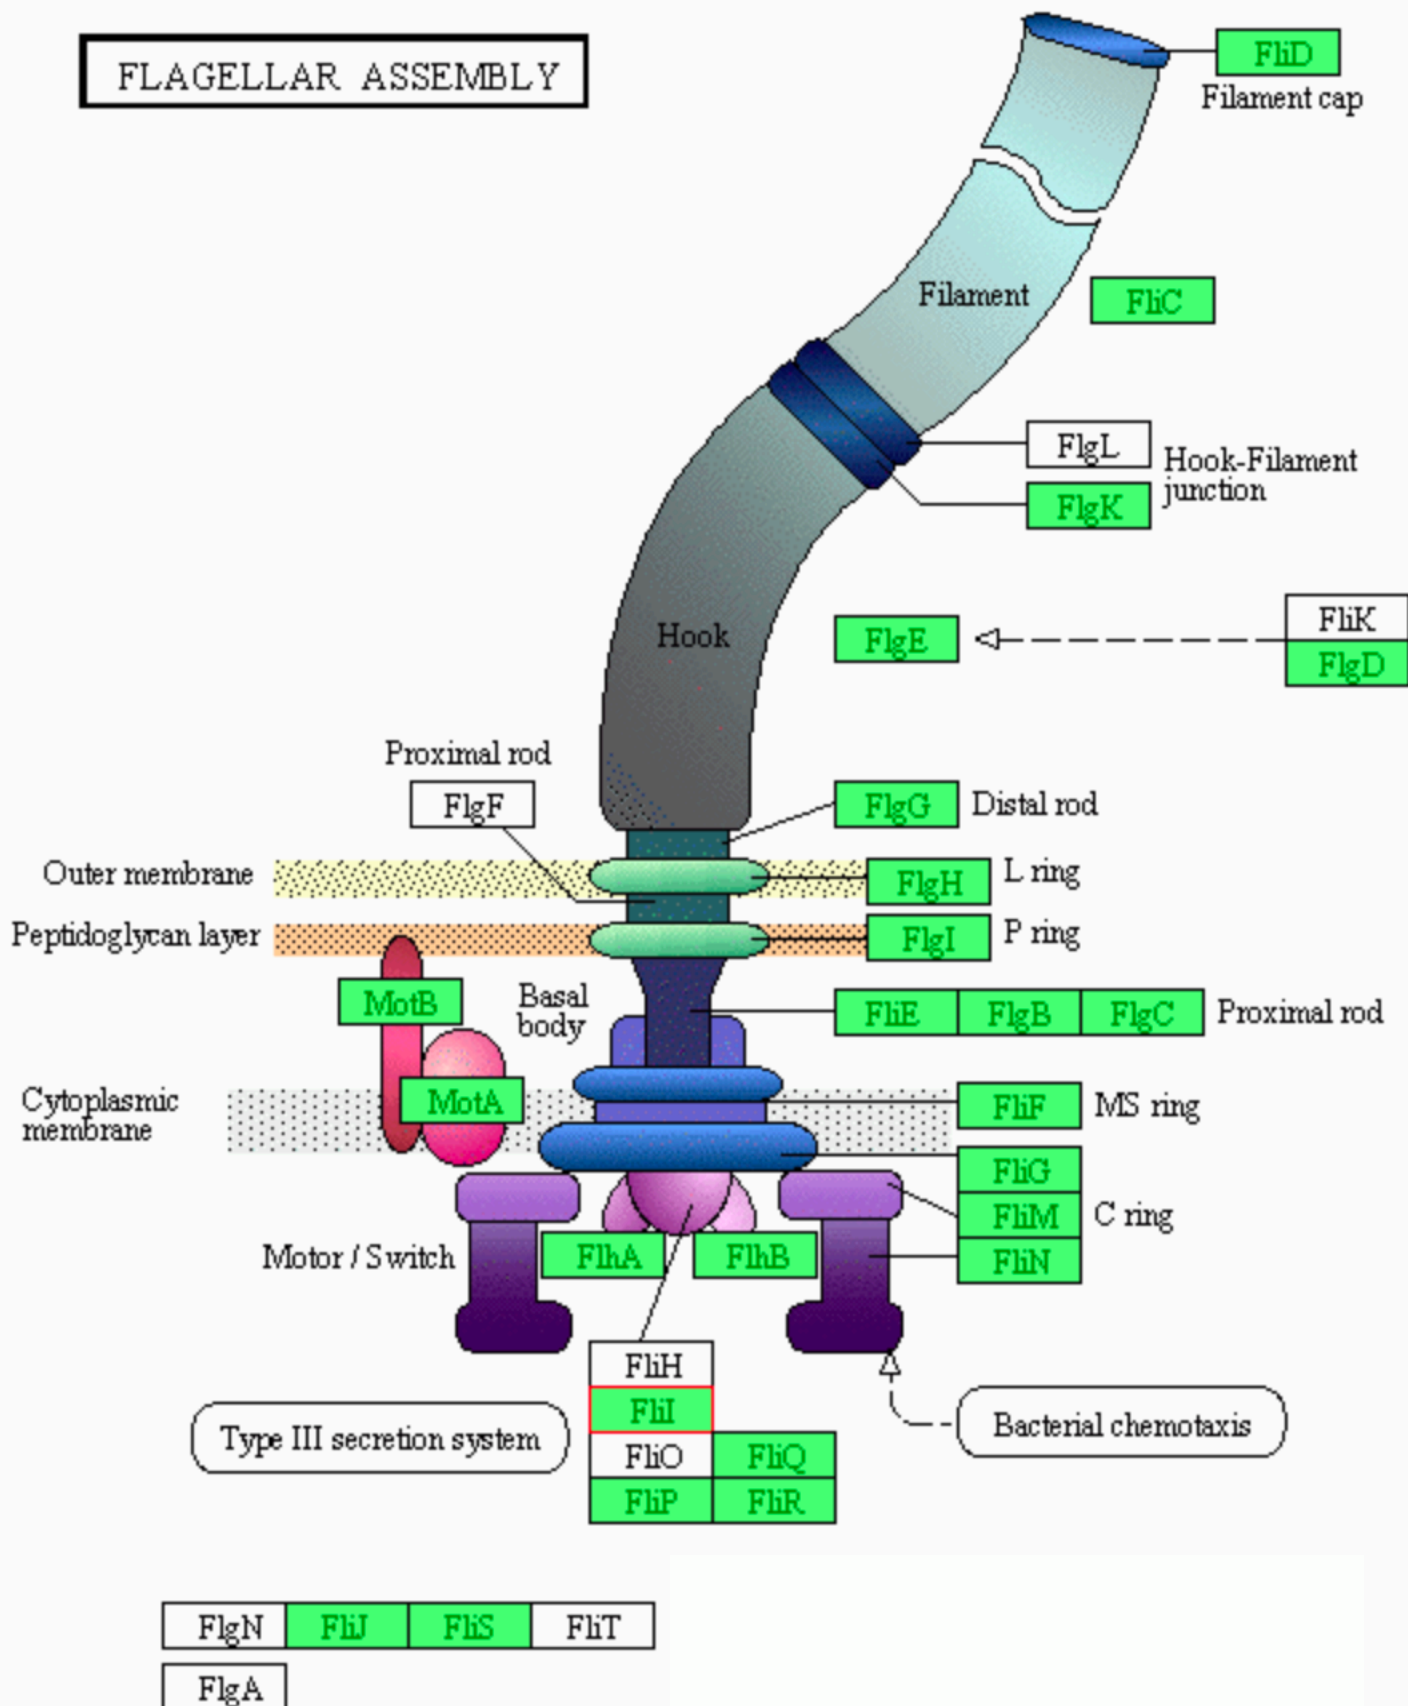

**Supplementary Figure 2.** Expanded view of the flagellar assembly. Genes encoding relevant proteins that were found in the *Ca. Abyssubacteria* genomes are highlighted in green. Genes not present are white. Figure generated on the IMG/ER database.
